# Supplementary material for: The overlap of accessory virulence factors and multidrug resistance among clinical and surveillance Klebsiella pneumoniae isolates from a neonatal intensive care unit in Nepal: a single-centre experience in a resource-limited setting
Source: Springer Nature journal article supplement (doi:10.1186/s41182-024-00595-3), 2024-04-08

Virulence genes

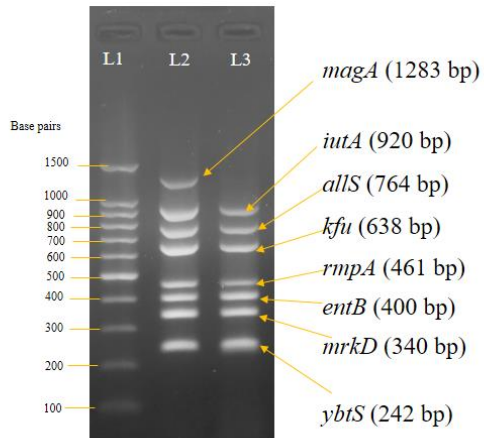

*bla*<sub>CTX-M</sub>

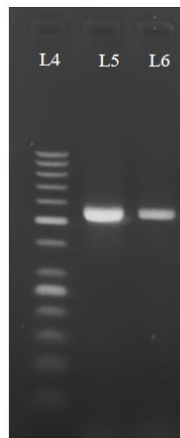

*bla*<sub>TEM</sub> and *bla*<sub>SHV</sub>

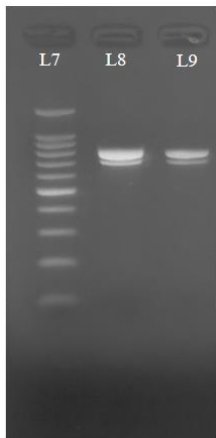

pAmpC

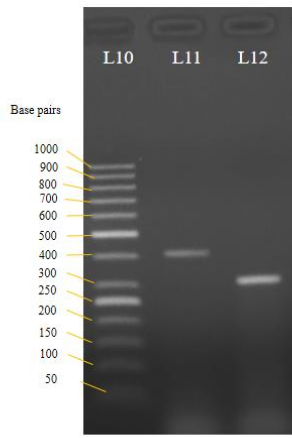

Carbapenemases

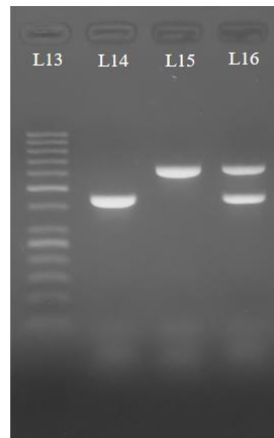

Supplement: MOESM2 [file 41182_2024_595_MOESM2_ESM.pdf]
