# Supplementary material for: The overlap of accessory virulence factors and multidrug resistance among clinical and surveillance Klebsiella pneumoniae isolates from a neonatal intensive care unit in Nepal: a single-centre experience in a resource-limited setting
Source: Springer Nature journal article supplement (doi:10.1186/s41182-024-00595-3), 2024-04-08
Supplement: MOESM3 [file 41182_2024_595_MOESM3_ESM.pdf]

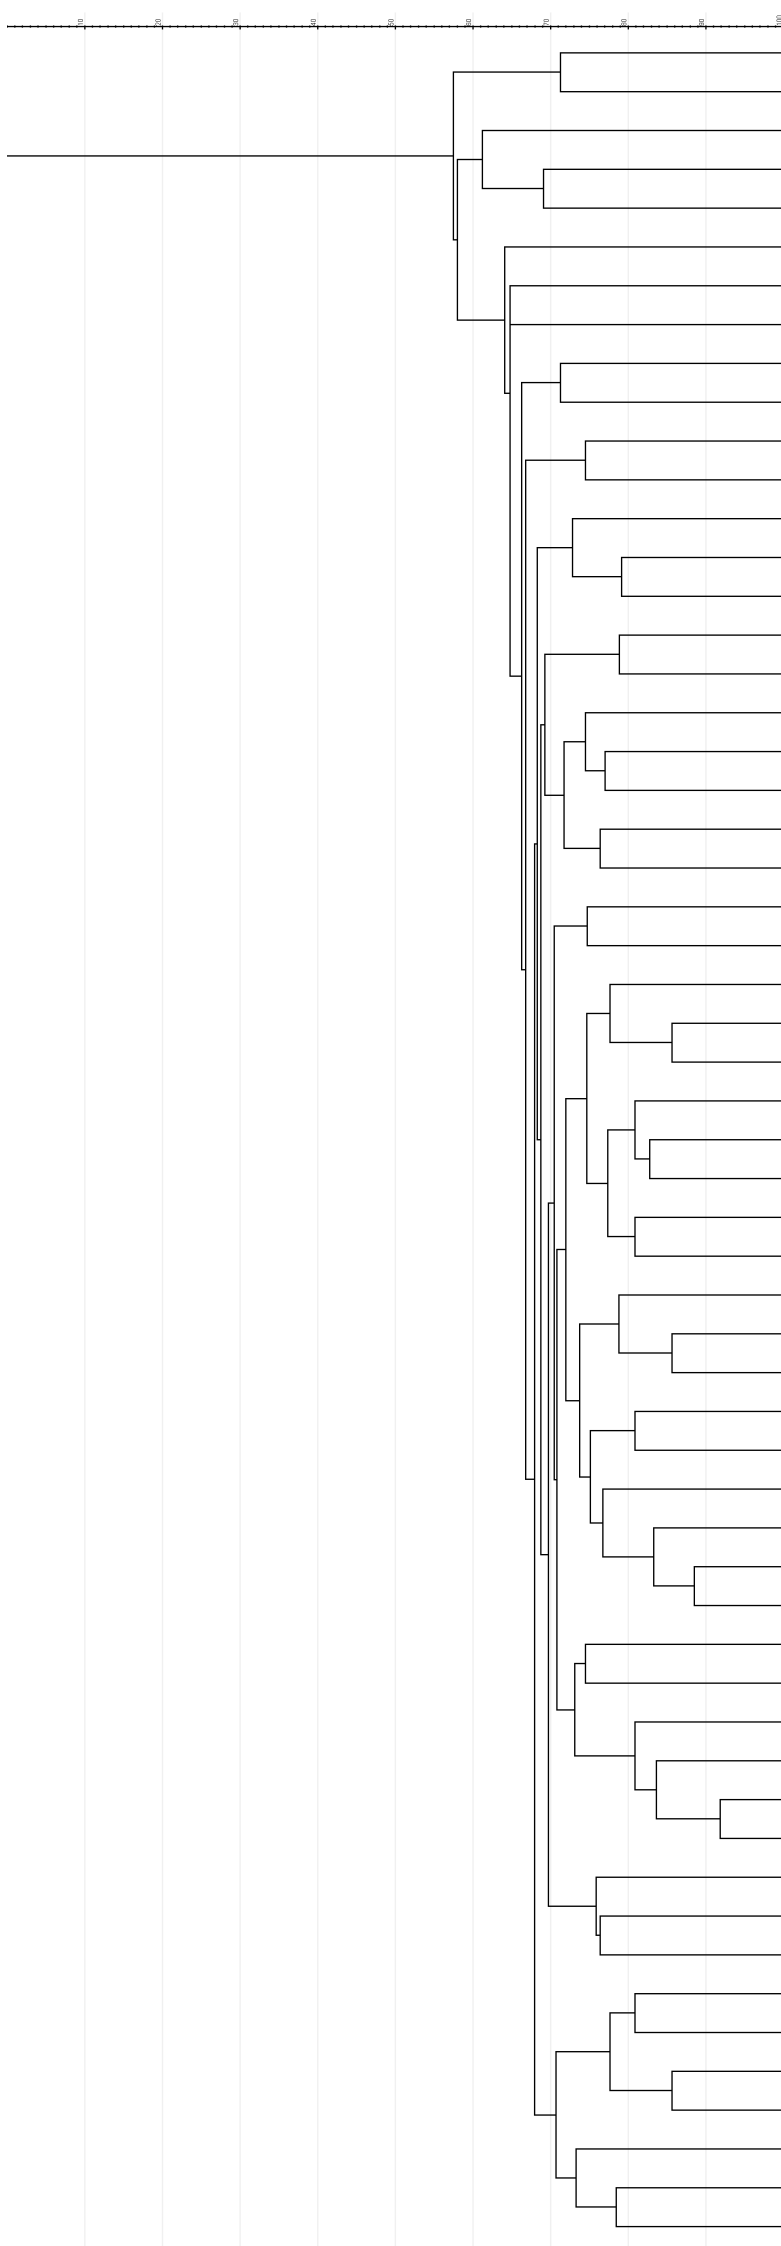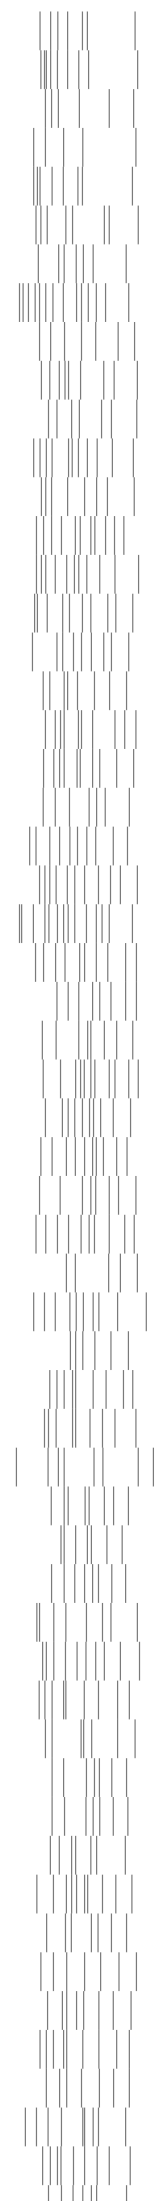

- CL\_06
- IN\_33
- IN\_40
- EN\_13
- IN\_37
- IN\_21
- IN\_23
- CL\_09
- CL\_10
- IN\_52
- CL\_03
- IN\_30
- IN\_25
- IN\_36
- EN\_19
- IN\_35
- EN\_16
- IN\_39
- IN\_54
- IN\_50
- CL\_07
- IN\_22
- IN\_38
- IN\_48
- IN\_47
- IN\_34
- IN\_51
- CL\_01
- CL\_02
- IN\_27
- IN\_57
- IN\_31
- EN\_18
- IN\_32
- IN\_28
- CL\_08
- IN\_45
- IN\_56
- IN\_49
- CL\_11
- IN\_26
- IN\_44
- CL\_04
- IN\_53
- IN\_20
- IN\_42
- IN\_43
- EN\_17
- IN\_41
- EN\_14
- CL\_12
- IN\_55
- IN\_29
- EN\_15
- IN\_24
- IN\_46
- CL\_05
